1 **Title: High-dimensional profiling reveals phenotypic heterogeneity and disease-specific**  
2 **alterations of granulocytes in COVID-19**

3

4 **Authors:** Magda Lourda<sup>1,2</sup>, Majda Dzidic<sup>1</sup>, Laura Hertwig<sup>1</sup>, Helena Bergsten<sup>1</sup>, Laura M. Palma  
5 Medina<sup>1</sup>, Egle Kvedaraite<sup>1,2</sup>, Puran Chen<sup>1</sup>, Jagadeeswara R. Muvva<sup>1</sup>, Jean-Baptiste Gorin<sup>1</sup>,  
6 Martin Cornillet<sup>1</sup>, Johanna Emgård<sup>1</sup>, Kirsten Moll<sup>1</sup>, Marina García<sup>1</sup>, Kimia T. Maleki<sup>1</sup>, Jonas  
7 Klingström<sup>1</sup>, Jakob Michaëlsson<sup>1</sup>, Malin Flodström-Tullberg<sup>1</sup>, Susanna Brighenti<sup>1</sup>, Marcus  
8 Buggert<sup>1</sup>, Jenny Mjösberg<sup>1</sup>, Karl-Johan Malmberg<sup>1</sup>, Johan K. Sandberg<sup>1</sup>, Jan-Inge Henter<sup>2,3</sup>,  
9 Elin Folkesson<sup>4,5</sup>, Sara Gredmark-Russ<sup>1,4</sup>, Anders Sönnernborg<sup>4,6</sup>, Lars I. Eriksson<sup>7,8</sup>, Olav  
10 Rooyackers<sup>8,9</sup>, Soo Aleman<sup>4,6</sup>, Kristoffer Strålin<sup>4,6</sup>, Hans-Gustaf Ljunggren<sup>1</sup>, Niklas K.  
11 Björkström<sup>1</sup>, Mattias Svensson<sup>1</sup>, Andrea Ponzetta<sup>1</sup>, Anna Norrby-Teglund<sup>1</sup>, Benedict J.  
12 Chambers<sup>1</sup>; and the Karolinska KI/K COVID-19 Study Group

13

14 **Authorship note:**

15 ML, MD and LH share first authorship.

16 AP, ANT and BJC share last authorship.

17 Correspondence: Magda Lourda ([magdalini.lourda@ki.se](mailto:magdalini.lourda@ki.se))

18

19 **Affiliations:**

20 <sup>1</sup>Center for Infectious Medicine, Department of Medicine Huddinge, Karolinska Institutet,  
21 Karolinska University Hospital, Stockholm, Sweden

22 <sup>2</sup>Childhood Cancer Research Unit, Department of Women's and Children's Health, Karolinska  
23 Institutet, Stockholm, Sweden

24 <sup>3</sup>Theme of Children's Health, Karolinska University Hospital, Stockholm, Sweden

25 <sup>4</sup>Department of Infectious Diseases, Karolinska University Hospital, Stockholm, Sweden

**NOTE: This preprint reports new research that has not been certified by peer review and should not be used to guide clinical practice.**

26 <sup>5</sup>Division of Infectious Diseases, Department of Medicine Solna, Karolinska Institutet,  
27 Stockholm, Sweden

28 <sup>6</sup>Division of Infectious Diseases and Dermatology, Department of Medicine Huddinge,  
29 Karolinska Institutet, Stockholm, Sweden

30 <sup>7</sup>Department of Physiology and Pharmacology, Section for Anesthesiology and Intensive Care,  
31 Karolinska Institutet, Stockholm, Sweden

32 <sup>8</sup>Function Perioperative Medicine and Intensive Care, Karolinska University Hospital,  
33 Stockholm, Sweden

34 <sup>9</sup>Department of Clinical Interventions and Technology CLINTEC, Division for Anesthesiology  
35 and Intensive Care, Karolinska Institutet, Stockholm, Sweden.

36

37 **Conflict of interest statement:**

38 K-JM is a Scientific Advisor and has a research grant from Fate Therapeutics and is a member  
39 of the Scientific Advisory Board of Vycellix Inc. H-GL is a member of the board of XNK  
40 Therapeutics AB and Vycellix Inc. J-IH serves as consultant for Sobi AB. The remaining  
41 authors have declared that no conflict of interest exists.

42

43 **Abstract**

44 Since the outset of the COVID-19 pandemic, increasing evidence suggests that the innate  
45 immune responses play an important role in the disease development. A dysregulated  
46 inflammatory state has been proposed as key driver of clinical complications in COVID-19,  
47 with a potential detrimental role of granulocytes. However, a comprehensive phenotypic  
48 description of circulating granulocytes in SARS-CoV-2-infected patients is lacking. In this  
49 study, we used high-dimensional flow cytometry for granulocyte immunophenotyping in  
50 peripheral blood collected from COVID-19 patients during acute and convalescent phases.  
51 Severe COVID-19 was associated with increased levels of both mature and immature  
52 neutrophils, and decreased counts of eosinophils and basophils. Distinct immunotypes were  
53 evident in COVID-19 patients, with altered expression of several receptors involved in  
54 activation, adhesion and migration of granulocytes (e.g. CD62L, CD11a/b, CD69, CD63,  
55 CXCR4). Paired sampling revealed recovery and phenotypic restoration of the granulocytic  
56 signature in the convalescent phase. The identified granulocyte immunotypes correlated with  
57 distinct sets of soluble inflammatory markers supporting pathophysiologic relevance.  
58 Furthermore, clinical features, including multi-organ dysfunction and respiratory function,  
59 could be predicted using combined laboratory measurements and immunophenotyping. This  
60 study provides a comprehensive granulocyte characterization in COVID-19 and reveals  
61 specific immunotypes with potential predictive value for key clinical features associated with  
62 COVID-19.

63 **Significance**

64 Accumulating evidence shows that granulocytes are key modulators of the immune response  
65 to SARS-CoV-2 infection and their dysregulation could significantly impact COVID-19  
66 severity and patient recovery after virus clearance. In the present study, we identify selected  
67 immune traits in neutrophil, eosinophil and basophil subsets associated to severity of COVID-  
68 19 and to peripheral protein profiles. Moreover, computational modeling indicates that the  
69 combined use of phenotypic data and laboratory measurements can effectively predict key  
70 clinical outcomes in COVID-19 patients. Finally, patient-matched longitudinal analysis shows  
71 phenotypic normalization of granulocyte subsets 4 months after hospitalization. Overall, in this  
72 work we extend the current understanding of the distinct contribution of granulocyte subsets  
73 to COVID-19 pathogenesis.

74

## 75 **Introduction**

76 Caused by the novel coronavirus SARS-CoV-2, the current COVID-19 pandemic poses an  
77 unprecedented threat to the global health systems, with over 2 million confirmed deaths  
78 reported worldwide in January 2021 ([https://www.who.int/emergencies/diseases/novel-](https://www.who.int/emergencies/diseases/novel-coronavirus-2019)  
79 [coronavirus-2019](https://www.who.int/emergencies/diseases/novel-coronavirus-2019)). About 80% of COVID-19 patients present with a mild or moderate disease  
80 course, while 15-20% develop severe complications (1, 2), including respiratory failure,  
81 coagulation abnormalities and life-threatening acute respiratory distress syndrome (ARDS).  
82 A dysregulated inflammatory state has been proposed as a key driver of clinical complications  
83 of COVID-19 (3) and has been associated with increased mortality (4). High levels of several  
84 pro-inflammatory mediators (e.g. Interleukin-1 $\beta$  (IL-1 $\beta$ ), IL-6, Tumor necrosis factor  $\alpha$   
85 (TNF $\alpha$ ) and CXCL8) are detected early after viral infection (5), and the resolution of this  
86 inflammatory response seems impaired in patients with severe disease progression (5, 6). Many  
87 of these pro-inflammatory cytokines are associated with granulocyte activation and recruitment  
88 (7), and it has been reported that an increased neutrophil-to-lymphocyte ratio (NLR) in  
89 peripheral blood can be used as a prognostic marker of higher disease severity in COVID-19  
90 patients, similar to SARS-CoV-1 and MERS (8-10).

91 The cellular components of the polymorphonuclear granulocyte family – neutrophils,  
92 eosinophils and basophils – arise from a common myeloid progenitor in humans (11) and  
93 represent the very first line of defense against invading microbes. The role of granulocytes in  
94 viral infection has mostly been confined to neutrophils (12, 13), though eosinophils and  
95 basophils have been implicated in the host response to viruses as well (14, 15). In COVID-19,  
96 an increased neutrophil abundance in circulation is mirrored by a substantial enrichment of  
97 granulocytes in the inflamed lung (16, 17). Several reports highlighted the presence of  
98 immature neutrophils in blood of COVID-19 patients (18, 19), implying a marked emergency  
99 granulopoiesis occurring in the bone marrow. The presence of immature neutrophil populations

100 is phenotypically reminiscent of granulocytic myeloid-derived suppressor cells (G-MDSCs),  
101 and has thus been linked to a potential immunosuppressive role of neutrophils during SARS-  
102 CoV-2 infection (19, 20). A confounding factor in many of the reported studies is represented  
103 by the broad use of peripheral blood mononuclear cells (PBMC) (e.g. (6, 18, 21)), where only  
104 the low-density granulocytic fraction can be captured, which could lead to an inherent bias in  
105 the result interpretation (22, 23). Longitudinal studies performed during the course of SARS-  
106 CoV-2 infection have revealed that neutrophil numbers slowly decrease during infection, and  
107 the rate of such decrease is lower in more severe patients (6). Interestingly, basophil and  
108 eosinophil counts were found to be inversely correlated with neutrophil levels (24).

109 In the present study we set out to delineate the phenotypic alterations within neutrophil,  
110 eosinophil and basophil populations during the early phase of SARS-CoV-2 infection in  
111 patients with acute COVID-19 and in the convalescent phase. We provide a detailed analysis  
112 at the single-cell resolution of granulocyte diversity in fresh whole blood of COVID-19 patients  
113 using 25-color flow cytometry, integrated with soluble factor detection by proteomics and  
114 detailed clinical information. Overall, this study delineates the biological contribution of  
115 granulocyte subsets to COVID-19 pathogenesis, with an emphasis on their phenotypical  
116 heterogeneity in viral infection. The data reveals specific immunotypes with potential  
117 predictive value for key clinical features associated with COVID-19 severity.

118

119 **Results**

120 *Altered composition of granulocyte populations is associated with disease severity in COVID-*  
121 *19*

122 To provide an in-depth characterization of the granulocyte compartment in patients with  
123 moderate or severe COVID-19, we designed a strategy based on the integrated analysis of high  
124 dimensional flow cytometry data from whole blood cells, extensive proteomic screening in  
125 serum and plasma, and detailed clinical and laboratory information from patients included in  
126 the study (Figure 1A). Twenty-six hospitalized COVID-19 patients (10 moderate and 16  
127 severe) and age-matched healthy controls were recruited at Karolinska University Hospital as  
128 part of the Karolinska KI/K COVID-19 Immune Atlas effort (25-28) (Figure 1B, Supplemental  
129 Tables 1-3). No differences in age, sex, body-mass index (BMI) or time from symptom debut  
130 until hospital admission, were present between moderate and severe patients (Figure 1B,  
131 Supplemental Table 2). The severe group displayed higher concentration of the inflammatory  
132 markers D-dimer and C-reactive protein (CRP), coagulation and inflammatory markers, and  
133 included all patients (n=4) who subsequently died in the hospital (Figure 1B).

134 A 25-color flow cytometry panel was applied on freshly isolated whole blood cells from  
135 COVID-19 patients and healthy controls (Figure 1C) to identify and characterize the main  
136 granulocyte subsets. To minimize batch-effects, samples were processed and acquired during  
137 a short period of time (3 weeks). A manual gating strategy for neutrophils, eosinophils and  
138 basophils was used based on expression of canonical lineage-defining markers (Figure 1C).  
139 Neutrophils were identified as  $CD15^+CD193^-CD66b^+CD16^{bright/dim}$ , eosinophils as  
140  $CD15^{bright/dim}CD193^{bright/dim}CD16^-FceR1^{dim}CD123^{dim/-}$  and basophils as  $CD15^-$   
141  $CD193^{bright}FceR1^{bright}CD123^{bright}HLA-DR^{dim/-}$ . Projection of gated cells into the Uniform  
142 Manifold Approximation and Projection (UMAP) space integrating all the analyzed markers  
143 confirmed the efficacy of the manual gating strategy (Figure 1C).

144 The analysis of absolute leukocyte counts in COVID-19 patients highlighted relevant  
145 alterations in the granulocyte compartment in peripheral blood. In particular, neutrophils were  
146 significantly increased in patients with severe disease course, while eosinophils and basophils  
147 were decreased in COVID-19 patients when compared to non-infected healthy controls (Figure  
148 1D). A similar trend was observed in the relative frequencies of granulocyte subsets over total  
149 leukocytes. A higher proportion of neutrophils in patients with moderate and severe COVID-  
150 19 ( $66.65 \pm 11.71\%$  and  $78.96 \pm 8.83$  respectively) was associated with the reduction of the  
151 eosinophil and basophil fractions (up to 3 and 7.5-fold, respectively, Figure 1E). The ratios of  
152 neutrophils over eosinophils or basophils increased in both patient groups, while no difference  
153 in the eosinophil to basophil ratios was observed between controls and patients (Supplemental  
154 Figure 1A). In line with previous reports (29), we found that severe COVID-19 was associated  
155 with higher neutrophil-to-lymphocyte and neutrophil-to-T cell ratios, as determined by  
156 absolute cell count (Figure 1F, Supplemental Figure 1B). We observed an opposite trend for  
157 basophils, which was associated with disease severity, while we did not detect any significant  
158 alteration in the eosinophil to lymphocyte or eosinophil to T cell ratios (Figure 1F,  
159 Supplemental Figure 1B).

160 This set of data highlights that the granulocyte expansion observed during acute SARS-CoV-  
161 2 infection is dominated by neutrophils and is coupled to the reduction of the physiological  
162 levels of circulating eosinophils and basophils.

163

164 *Severe COVID-19 is characterized by the emergence of immature neutrophils in peripheral*  
165 *blood*

166 Neutrophils have been shown to display a high degree of phenotypical heterogeneity, which  
167 has important implications on their function in several pathological contexts (30). Different



168 neutrophil maturation states are associated with major phenotypic differences, e.g. CD16  
169 upregulation during development (23, 30). In COVID-19 patients, particularly in those with  
170 severe disease, we observed a robust enrichment of a neutrophil subset characterized by low  
171 expression of CD16 suggesting that these were immature CD16<sup>dim</sup> neutrophils (Figure 2A).

172 A significant increase in absolute numbers was detected for both CD16<sup>bright</sup> and CD16<sup>dim</sup>  
173 neutrophil subsets in COVID-19 patients, which positively correlated with disease severity  
174 (Figure 2B). In addition, a significant increase in the relative fraction of CD16<sup>dim</sup> neutrophils  
175 was detected, indicating an overall expansion of immature neutrophils in COVID-19 patients  
176 (Figure 2C).

177 In order to analyze the phenotypic traits of the neutrophil subsets identified above in an  
178 unsupervised way, 30,000 events in the neutrophil gate from each study participant were  
179 concatenated and then down-sampled to 0.5 million cells. By integrating the expression of 20  
180 phenotypic markers in the UMAP analysis, we observed only modest differences comparing  
181 neutrophils from healthy controls and COVID-19 patients, within the UMAP space (Figure  
182 2D). In addition, the CD16<sup>bright</sup> and CD16<sup>dim</sup> neutrophil subsets from controls and COVID-19  
183 patients clustered separately from each other (Figure 2E), indicating substantial phenotypic  
184 differences, which did not depend on the disease state.

185 Next, the expression of markers related to neutrophil development, migration and activation  
186 was analyzed. The mature CD16<sup>bright</sup> neutrophil subset was characterized by higher expression  
187 of CD177, CD11b, CXCR1, CXCR2 and CD62L compared to the CD16<sup>dim</sup> population. On the  
188 other hand, CD16<sup>dim</sup> neutrophils were characterized by higher levels of CD66b, LOX-1 and  
189 CD24, which are associated to early stages of neutrophil development (31), confirming the  
190 immature phenotype of this subset (Figures 2F-G, Supplemental Figures 2A-B).

191 We also observed significant upregulation of CD66b, CD177, CD11b, CXCR4, CD147 (the  
192 receptor that binds the spike protein of SARS-CoV-2) and CD63 in mature neutrophils from  
193 COVID-19 patients compared to healthy controls, as well as significant downregulation of  
194 CXCR2 (Figure 2G, Supplemental Figure 2A). No differences in the expression of markers  
195 related to either co-stimulatory or inhibitory functions, such as HLA-DR, CD86 and PD-L1  
196 between healthy controls and COVID-19 patients within either neutrophil subset were detected  
197 (Figure 2G, Supplemental Figures 2A-B).

198 While the presented analysis showed several phenotypic differences between healthy controls  
199 and COVID-19 patients, we were unable to detect prominent alterations between the moderate  
200 and severe patients for any of the neutrophil subsets analyzed (Figure 2G, Supplemental Figure  
201 2A-B). Such phenotypic similarity between the global neutrophil compartment in moderate  
202 and severe COVID-19 patients was confirmed by principal component analysis (PCA) (Figure  
203 2H).

204 Collectively, our analysis highlights the accumulation of immature CD16<sup>dim</sup> neutrophils and  
205 the concurrent activation of the mature neutrophil fraction in peripheral blood of COVID-19  
206 patients.

207

208 *The abundance of activated neutrophil immunotypes correlates with markers of anti-viral*  
209 *immune response in moderate patients*

210 To investigate further whether specific neutrophil phenotypes were associated with disease  
211 progression or severity, unsupervised phenograph clustering was performed on neutrophils  
212 derived from all study participants (Figure 3A). In total, 27 clusters were identified with a  
213 varying prevalence in the three study groups (Figure 3B). Hierarchical clustering based on  
214 marker expression was sufficient to group clusters more abundant in moderate patients (i.e.

215 clusters 16, 22 and 27) (Figure 3C). Specifically, these clusters belonged to the CD16<sup>bright</sup>  
216 subset and displayed higher expression levels of CD11b, CD177 and CD66b. On the other  
217 hand, clusters that were enriched in severe COVID-19 encompassed the immature CD16<sup>dim</sup>  
218 population and displayed a more heterogeneous phenotype (Figure 3C). In particular, clusters  
219 18, 19 and 23, which were more enriched in severe patients, showed lower levels of several  
220 activation markers including CD66b, CD11a and CD11b (Supplemental Figure 3A).  
221 Correlation of cluster frequencies in each patient with the concentration of 253 serum/plasma  
222 factors (Supplemental Table 4) followed by hierarchical clustering highlighted specific  
223 correlation patterns associated with trends in cluster enrichment within specific disease groups  
224 (Figure 3D). In particular, clusters 16, 22 and 27, which were enriched in moderate COVID-  
225 19, displayed a positive correlation with several molecules of type 1 response (CXCL9,  
226 CXCL10 and IL-15), anti-viral response (interferon regulatory factor 9 (IRF9), IL-12p70 and  
227 interferon- $\gamma$  (IFN $\gamma$ )) and adaptive immunity (B-cell activating factor (BAFF) and IL-2) (Figure  
228 3D). In addition, key molecules involved in eosinophil/basophil homeostasis and recruitment  
229 (IL-5, CCL3 and stem cell factor (SCF)) were also positively correlated with these clusters.  
230 Within the clusters associated with severe patients, several members of the coagulation cascade  
231 (Factor VII, VIII and IX) and molecules associated with neutrophil maturation (i.e.  
232 granulocyte-colony stimulating factor (G-CSF) and myeloperoxidase (MPO)) were positively  
233 correlated (Figure 3D). Shared patterns within cluster groups (e.g. 22, 27 and 5, 23) were also  
234 observed when separately analyzing correlations in moderate and severe COVID-19  
235 (Supplemental Figure 3B and Supplemental Table 5), suggesting that the degree of disease  
236 severity could influence relationships between specific neutrophil immunotypes and soluble  
237 factors.

238 In summary, the phenograph-guided in-depth dissection of the neutrophil subset composition  
239 allowed us to identify selected immunotypes associated with high circulating levels of  
240 prototypical molecules of type-1 related anti-viral immune response.

241

242 *Eosinophil activation profile in COVID-19 correlates with markers of anti-viral immune*  
243 *response*

244 Through UMAP analysis integrating the expression of 21 surface markers on eosinophils, we  
245 observed that eosinophils from healthy donors clustered separately from the eosinophils of  
246 patients with COVID-19 (Figure 4A), indicating significant phenotypic alterations in the  
247 eosinophil populations upon SARS-CoV-2 infection. Eosinophils from COVID-19 had  
248 decreased expression of the markers of the eosinophil lineage (CD15, CD66b and CD193) (32)  
249 and higher expression of classical activation markers, such as CD62L, CD69, as well as CD147  
250 (Figure 4B, Supplemental Figure 4A). Phenotypic analysis showed differences between  
251 healthy controls and COVID-19 patients, but also between patients with moderate and severe  
252 COVID-19 for some of the parameters analyzed. Patients with moderate COVID-19 expressed  
253 significantly higher levels of CD66b, CD11b, CD11a and CD24 compared to patients with  
254 severe COVID-19 (Figure 4C, Supplemental Figure 4B). Notably within the severe group, the  
255 deceased patients had the highest CD69 expression (Figure 4C). PCA analysis recapitulated  
256 these differences, highlighting CD193, CD66b, CD11a, CD24, CXCR4 and CD62L as the  
257 mostly affected parameters in eosinophils from COVID-19 patients (Figure 4D).

258 We observed that patients with COVID-19 also had a significantly increased frequency of  
259 CD69<sup>+</sup> eosinophils (Figures 4E-F). Indeed, despite the strong eosinopenia (Figure 1D), the  
260 absolute counts of CD69<sup>+</sup> eosinophils were not significantly altered in COVID-19 patients  
261 (Figure 4F). CD69<sup>+</sup> eosinophils displayed significantly higher expression of CD66b, CD147,

262 CD11b and CD193, compared to the corresponding CD69<sup>-</sup> counterpart, confirming their  
263 activation state (Figures 4G-H, Supplemental Figure 4D). Despite their CD69 expression,  
264 activated eosinophils from severe COVID-19 patients displayed lower CD11a, CD66b, and  
265 CD147 expression compared to CD69<sup>+</sup> eosinophils from the group with moderate disease  
266 (Figures 4G-H, Supplemental Figure 4D), suggesting a partial functional impairment of  
267 eosinophils in the more severe COVID-19 stages.

268 The absolute counts of eosinophils in blood correlated inversely with the peripheral levels of  
269 SCF and molecules involved in cell response to viral infection, such as DDX58 (DEXD/H-Box  
270 Helicase 58, also known as RIG-I), IFN $\gamma$  and CXCL10 (Figure 4I). Conversely, the eosinophil  
271 levels in blood correlated positively with the levels of Interleukin-1 receptor-associated kinase  
272 1 (IRAK1), latency associated peptide-transforming growth factor  $\beta$ 1 (LAP-TGF $\beta$ 1),  
273 chemoattractants CCL13, CCL17 and CXCL6 and the coagulation factor VIII (Figure 4I). The  
274 frequency of CD69<sup>+</sup> eosinophils correlated positively with the levels of molecules related to  
275 IFN $\gamma$ , CCL2, CCL7, CCL8, Pentraxin-3, leukemia inhibitory factor receptor (LIFR), as well  
276 as PD-L1. sCD163 correlated negatively with the frequency of CD69<sup>+</sup> eosinophils but  
277 positively with the absolute counts and frequencies of eosinophils. Representative plots of the  
278 most significantly correlated parameters are shown in Supplemental Figure 4E, while the most  
279 significant correlations for the moderate and severe groups separately are shown in  
280 Supplemental Figure 4F. In conclusion, our results indicate that the eosinophils in the blood of  
281 patients with COVID-19 are activated in response to SARS-CoV-2 infection and express high  
282 levels of key receptors for lung tissue infiltration, particularly in patients with moderate  
283 COVID-19.

284

285 *Basophils in COVID-19 patients display an activated phenotype*

286 UMAP analyses revealed distinctive clusters in the healthy controls and COVID-19 patients,  
287 suggesting alterations in basophil phenotype during the disease (Figure 5A). Specifically,  
288 clusters associated with COVID-19 had higher expression of markers important for the  
289 activation and recruitment of basophils, including CD11b, CD63, and CXCR4 (Figure 5B;  
290 Supplemental Figure 5A). Specific upregulation of CD62L, CD147 and CD177 were observed  
291 on basophils from moderate COVID-19 patients (Figure 5C, Supplemental Figure 5B). On the  
292 other hand, PD-L1 expression was reduced in all patients compared to healthy controls. The  
293 differences in marker expression on basophils between healthy controls and COVID-19  
294 patients were further confirmed by PCA, with CXCR4, CD62L, CD193 and PD-L1 among the  
295 most contributing parameters driving the separation (Figure 5D). We further examined the  
296 correlation of basophils with soluble factors (Figure 5E, Supplemental Figure 5D-E). The  
297 basophil frequency was negatively correlated with soluble DDX58, and with the transcription  
298 factors amphiregulin (AREG), FOSB and Zinc finger and BTB domain-containing protein 16  
299 (ZBTB16). Similar to eosinophils, basophil frequency was also negatively correlated with  
300 CCL7. In contrast, CCL22, CCL28 and Fms-related tyrosine kinase 3 ligand (Flt3L) were  
301 positively correlated to basophil frequency, particularly in COVID-19 patients with moderate  
302 disease (Figure 5E, Supplemental Figure 5E). Other soluble factors that were also positively  
303 associated with basophil frequency were CD83 and tumor necrosis factor-related apoptosis-  
304 inducing ligand (TRAIL). In summary, the data show that basophils are depleted in COVID-  
305 19 patients, a pattern associated with disease severity, and that circulating basophils from  
306 patients display an activated phenotype.

307

308 *Eosinophil activation and neutrophil maturation contribute to predictive models of Sequential*  
309 *Organ Failure Assessment (SOFA) score and respiratory function*

310 Our well-defined patient cohort allowed us to compare in detail the phenotypic alterations in  
311 granulocyte subsets in relation to severity of COVID-19 (Supplemental Table 1). In order to  
312 elucidate the underlying relationships between immune traits and relevant clinical parameters  
313 registered during hospitalization, we performed multivariate linear regression. The models  
314 were based on a comprehensive data set including surface marker expression levels, absolute  
315 numbers, frequencies of granulocyte subsets, available clinical information and laboratory  
316 measurements. The final set of variables used in the predictive models were selected based on  
317 their correlation with the tested clinical outcomes and their relevance in the specific predictive  
318 models (Figure 6A).

319 The analysis revealed that the levels of CD11a expression on eosinophils contributed to the  
320 linear model for prediction of SOFA score for patients included in our study (Adj.  $R^2=0.74$ ,  
321  $p=3.8 \times 10^{-6}$ , Figure 6B). Notably, the relevance of CD11a expression on eosinophils was higher  
322 in predicting the SOFA score (explaining around 50% of the model) than the levels of two  
323 laboratory parameters CRP and creatinine (Figure 6C).

324 We also developed models for prediction of respiratory function including  $\text{PaO}_2/\text{FiO}_2$  (P/F)  
325 ratio at baseline and maximum oxygen need during hospitalization. The linear model for P/F  
326 ratio prediction (Adj.  $R^2=0.60$ ,  $p=1.9 \times 10^{-4}$ , Figure 6D) included contributions of CD69  
327 expression on CD16<sup>dim</sup> neutrophils, of CD66b on eosinophils and of CRP. The linear model  
328 for maximum level of oxygen administration encompassed absolute numbers of mature  
329 neutrophils, CD66b expression on eosinophils and ferritin levels (Adj.  $R^2=0.74$ ,  $p=3.9 \times 10^{-6}$ ,  
330 Figure 6F). Notably, both models revealed a correlation between CD66b expression on  
331 eosinophils and degree of respiratory failure during COVID-19. Moreover, the combined effect  
332 of the immune parameters in both models was dominant, contributing to almost 80% of each  
333 model (Figures 6C, 6E and 6G). Correction for relevant parameters (e.g. age, BMI, sex, co-  
334 morbidities) did not significantly alter any of the linear models or the contribution of the

335 immune cell populations to them, further strengthening the link between granulocyte activation  
336 and clinical outcome (Supplemental Table 6). In summary, by applying a supervised machine-  
337 learning method we identified eosinophil activation and mature neutrophil counts to be strongly  
338 correlated to SOFA score and maximum oxygen need. These immunological signatures,  
339 together with other known laboratory markers, but not alone (Supplemental Figure 6), were  
340 sufficient to create predictive models.

341

342 *The phenotype of granulocytes is partly restored in patients who have recovered from COVID-*  
343 *19*

344 To determine whether the phenotypical alterations observed within the granulocyte  
345 compartment during acute COVID-19 were recovered after viral clearance, whole blood  
346 samples were collected from the same moderate (n=8) or severe (n=7) patients approximately  
347 four months (median=136 days, range=89-153 days) after hospital discharge (Figure 7A).  
348 Convalescent samples displayed normalized cell counts for neutrophils, eosinophils and  
349 basophils, as well as neutrophil-to-lymphocyte ratio, compared to the samples collected during  
350 acute viral infection (Figure 7B, Supplemental Figure 7A), while the relative abundance of the  
351 granulocyte subsets over total leukocytes was only partially restored (Figure 7C), suggesting  
352 that circulating non-granulocytic immune cells might still be quantitatively affected.  
353 Nevertheless, both absolute numbers and frequencies of granulocyte subsets in convalescent  
354 patients were very similar to those observed in healthy controls (Figures 7B-C). Additionally,  
355 PCA highlighted that convalescent patients were markedly more similar to healthy controls  
356 than to acute patients (Figure 7D). In particular, CD69 and CD193 expression on eosinophils,  
357 as well as CD147 expression on neutrophils and eosinophils, and basophil counts were among  
358 the variables contributing to the observed clustering (Figures 7E-F, Supplemental Figure 7B).



359 Immature CD16<sup>dim</sup> neutrophils, elevated in acute COVID-19, were almost absent in  
360 convalescence (Figure 7G). Neutrophils from convalescent patients showed normalized levels  
361 of CXCR1, CXCR4 and CD147 compared to acute infection (Figure 7H, Supplemental Figure  
362 7C). Eosinophil activation was also reduced in convalescent patients, as shown by the  
363 normalized expression of CD69, CD62L, CD63, and CD147, as well as by the increased PD-  
364 L1 expression (Figures. 7I-J, Supplemental Figure 7D). However, the expression of CD66b,  
365 CD15 and CD193 on eosinophils was not completely recovered in convalescent samples when  
366 compared to healthy controls (Figure 7J, Supplemental Figure 7D), suggesting that a partial  
367 phenotypic impairment might still be present in the eosinophil population. Similarly, basophils  
368 in the convalescent samples showed an overall recovery of several phenotypic traits altered in  
369 acute COVID-19. In particular, the expression levels of CD11b, CD63, CXCR4, and PD-L1  
370 (Figures 7K-L, Supplemental Figure 7E) were in line with the levels found in healthy controls.  
371

## 372 **Discussion**

373 The reported clinical relevance of the inflammatory state in the more severe forms of COVID-  
374 19 has raised an unprecedented awareness on the potential detrimental role of  
375 polymorphonuclear cells in acute viral infections (19). However, a comprehensive phenotypic  
376 description performed at the protein level on circulating granulocytes in SARS-CoV-2-infected  
377 patients is still lacking. In this report, we show that immature CD16<sup>dim</sup> neutrophils accumulate  
378 in peripheral blood of COVID-19 patients and confirm that general neutrophilia can be  
379 considered a hallmark of severe COVID-19. However, in contrast to the tenet linking  
380 neutrophil activation with more severe clinical conditions, our approach based on high-  
381 dimensional flow cytometry was able to identify activated neutrophil immunotypes detected  
382 preferentially in moderate patients showing a better clinical outcome. Furthermore, we  
383 extended our analysis to other granulocyte subsets, reporting the substantial ablation of both  
384 eosinophils and basophils in peripheral blood of COVID-19 patients. Such depletion could  
385 possibly result from two, non-mutually exclusive phenomena: first, both cell types might be  
386 recruited to inflamed tissues, and in particular to the lung. This hypothesis is supported by the  
387 relevant expression changes of several adhesion/migration molecules (e.g. CD62L, CD11a/b  
388 and CXCR4) on both eosinophils and basophils. Moreover, concentrations of key soluble  
389 factors involved in the recruitment of both granulocyte subsets (e.g. CCL13, CCL17, CCL22  
390 and CCL28) (33) correlated with their levels in circulation. A second explanation for the  
391 detected basopenia/eosinopenia in favor of an expanded neutrophil compartment might imply  
392 the re-programming of the granulocyte precursor in the bone marrow which typically occurs  
393 during emergency hematopoiesis (34).

394 The release of immature neutrophils in circulation has been observed in previous studies  
395 investigating a variety of viral infections, including HIV, dengue and SARS-CoV-2 (18, 19,  
396 35-38) and is strictly associated with emergency granulopoiesis. Recent studies included CD63

397 mRNA levels in an immature pro/pre-neutrophil signature (31), which was found significantly  
398 enriched in COVID-19 patients (19). In this regard, we found a robust CD63 upregulation on  
399 CD16<sup>dim</sup> neutrophils and a further increased expression in COVID-19 patients. Both moderate  
400 and severe COVID-19 patients were characterized by the progressive expansion of CD16<sup>dim</sup>  
401 neutrophils, which also expressed lower levels of CD177, CD11b and CD62L and higher levels  
402 of CD66b and LOX-1, a phenotype compatible with neutrophil immaturity (31).

403 Our in-depth phenograph-guided analysis of the neutrophil compartment revealed the  
404 enrichment of activated neutrophil immunotypes in moderate COVID-19 patients, associated  
405 with higher circulating levels of molecules involved in the IFN-mediated anti-viral response  
406 (i.e. IRF9, IL-12b, IFN $\gamma$ ). Neutrophils are known to be highly responsive to type I IFN in  
407 different contexts (39, 40) and recent studies described the existence of an IFN-responsive,  
408 developmentally distinct, neutrophil subset (41). Intriguingly, we observed a positive  
409 correlation between type 1 inflammatory mediators (e.g. IFN $\gamma$  and CXCL10) and eosinophil  
410 activation, suggesting that, particularly in moderately affected patients, part of the granulocyte  
411 compartment could be actively participating in the efficient viral clearance, similarly to what  
412 occurs upon influenza infection (42, 43). Interestingly, CD62L expression on eosinophils can  
413 be triggered by IFN $\gamma$ , and CD62L-expressing eosinophils have been suggested to contribute to  
414 dysregulated inflammation and ARDS in acute COVID-19 (24, 44).

415 Eosinophils have been reported to express receptors that allow the recognition and  
416 orchestration of anti-viral responses to respiratory viruses (43, 45, 46). Eosinophil-associated  
417 lung pathology has been reported in other viral infections and in SARS-CoV-1 vaccination  
418 studies (summarized in (47)). On the other hand, the role of human basophils in viral infections  
419 is poorly understood and mainly focused on basophil response to HIV (48, 49). CXCR4 is one  
420 of the most highly expressed basophil receptors in COVID-19 patients in our cohort and might  
421 be implicated in basophil trans-endothelial migration (49). CD63 expression on basophils can

422 be induced by cross-linking of CD62L and CD11b, amongst other stimuli (50). Therefore, the  
423 upregulation of CD62L, CD63, CD11b, and CXCR4 on basophils observed during the acute  
424 phase of COVID-19 and their normalization after viral clearance might imply a role of this  
425 phenotype in COVID-19 pathophysiology.

426 In contrast to the neutrophil phenotypes observed in moderate COVID-19, the neutrophil  
427 clusters enriched in patients with severe disease correlated with several coagulation factors and  
428 with molecules involved in neutrophil maturation (G-CSF and MPO), but not with any of the  
429 screened anti-viral response-related molecules. This suggests an impaired neutrophil response  
430 during the more severe phases of the disease. Notably, we did not detect evident signs of  
431 immune-suppressive activity (e.g. PD-L1 expression) in our phenotypic analysis, and direct  
432 functional evidence will be crucial to assess whether increased suppressive functions are  
433 triggered in neutrophils in severe COVID-19 patients. In addition, despite their CD69  
434 expression, activated eosinophils in severe COVID-19 patients displayed lower levels of  
435 CD11a, CD63, and CD66b compared to the CD69<sup>+</sup> eosinophils from patients with moderate  
436 COVID-19. This phenotype is indicative of activated eosinophils suggesting that they might  
437 have recently degranulated (32, 51). Overall, our analyses showed that the robust activation  
438 observed in the granulocyte compartment in moderate COVID-19 declines in the more severe  
439 stages of the disease.

440 Combination of eosinopenia with elevated CRP could effectively triage suspected patients with  
441 COVID-19 from other patients with fever (52). A relevant finding emerging from our study is  
442 that selected granulocytic phenotypical traits could, in concert with other known laboratory  
443 markers such as CRP or creatinine, predict to a significant extent, key clinical outcomes,  
444 including respiratory functionality and SOFA score. Although this finding needs to be taken  
445 with caution considering the limited size of our patient cohort, we provide the proof-of-  
446 principle that the combination of immunological, and specifically granulocyte-related,

447 measurements with standard clinical data could be used in generating algorithms for patient  
448 classification and, thus, tailored therapeutic regimens. Notably, the immunological parameters  
449 were predominant in driving the prediction models in comparison to standard laboratory  
450 measurements. On the same lines, we connected clinical manifestations, such multi-organ  
451 failure and pulmonary function, with specific phenotypes, primarily the eosinophil activation  
452 markers CD11a, CD66b, and CD69. Future studies will be important to assess and validate  
453 whether there is a mechanistic link between granulocyte activation and specific clinical features  
454 of COVID-19 patients.

455 Finally, by taking advantage of paired longitudinal sampling, we report the almost complete  
456 phenotypic recovery upon viral clearance of the phenotypic alterations observed in  
457 granulocytes from acute SARS-CoV-2 infection. Our findings are in agreement with previous  
458 studies showing the replenishment of the eosinophil and basophil pool and the normalization  
459 of neutrophil numbers in circulation (24, 53). The current study, however, is the first to  
460 characterize in depth the eosinophil and basophil profile in patients with COVID-19 and their  
461 phenotypic alterations linked to disease. This is emphasized by the finding that six out of the  
462 ten most significant immunological parameters that drive the separate clustering of patients  
463 with acute COVID-19 from matched convalescent samples or healthy controls are eosinophil  
464 traits. However, the expression of a set of markers (CD15, CD66b, and CD193) was not  
465 completely recovered in convalescent samples when compared to non-infected healthy  
466 controls, suggesting a partial remaining phenotypic impairment in the granulocyte population  
467 in convalescent samples, at least four months after hospital discharge.

468 The inference of mechanisms driving COVID-19 immunopathology from the analysis of  
469 circulating granulocytes might have limitations when considering the pulmonary damage  
470 displayed in COVID-19 patients. However, several studies have shown that the combined use  
471 of peripheral immune signatures, soluble factors and patient metadata retain the capacity to

472 predict clinical outcome to a notable extent (6, 53). Moreover, accumulating evidence indicates  
473 that other tissues (e.g. kidney, gut, brain) are affected by COVID-19-related immune  
474 alterations, thus underscoring the systemic nature of this disease and emphasizing the relevance  
475 of studying alterations in peripheral immune cells (54). Our findings highlight the significant  
476 alterations of granulocyte subpopulations in frequency and function in the blood of patients  
477 with COVID-19. Moreover, our data indicate the potential contribution of granulocytes to  
478 SARS-CoV-2 immunopathology and point towards the combined use of granulocyte-related  
479 immunological parameters and basic clinical laboratory tests as better prognostic biomarkers  
480 of disease severity and disease course.

481

## 482 **Materials and Methods**

### 483 **Study cohort**

484 SARS-CoV-2 infected patients with COVID-19 admitted at the intensive care or high  
485 dependency unit (n=16, severe COVID-19) or the infectious disease clinic (n=10, moderate  
486 COVID-19) at Karolinska University Hospital, Stockholm, Sweden, were recruited to this  
487 study. Serum and EDTA blood samples were collected and analyzed. Inclusion and exclusion  
488 criteria for patient enrollment and collected clinical information and laboratory values of the  
489 patients are provided in Supplemental Tables 1-3. Convalescent serum and EDTA samples  
490 were later collected from 15 patients (8 and 7, from the moderate and severe groups,  
491 respectively) approximately 4 months after hospital discharge (median=136 days, range=89-  
492 153 days). As controls, serum and blood samples from age- and sex-matched SARS-CoV-2  
493 IgG seronegative healthy volunteers (Supplemental Table 1) were collected on the same days  
494 as the acute COVID-19 (n=17) and convalescent (n=11) patients. All samples were processed  
495 using the same standardized operating procedures. Informed consent was obtained from all  
496 study participants and the study was approved by the regional Ethics Committee in Stockholm,  
497 Sweden, and performed in accordance with the Declaration of Helsinki.

498

### 499 **Absolute counts of leukocytes in peripheral blood**

500 Absolute counts of peripheral blood leukocytes were determined for all study participants using  
501 BD Trucount tubes (6-color TBNK Reagent and, in addition, CD123 BUV395 (BD  
502 Biosciences), CD15 PB, CD193 BV605 and HLA-DR BV785 (Biolegend) and CD14 PE-Cy5  
503 (eBioscience) according to the manufacturer's instructions. Samples were fixed in 1X BD  
504 FACS lysing solution (BD Biosciences) for 2h and acquired on a BD FACSymphony A5  
505 instrument, equipped with UV (355nm), violet (405 nm), blue (488 nm), yellow/green (561  
506 nm) and red (637 nm) lasers. For absolute cell count calculations, the number of events for

507 populations of interest was divided by the number of bead events and multiplied by the BD  
508 Trucount bead count.

509

### 510 **Proximity extension assay**

511 The proximity extension assay technology (PEA), based on Q-PCR quantification of pair-wise  
512 binding of oligonucleotide-labeled target antibodies (OLINK AB, Uppsala, Sweden), was used  
513 for the quantification of 276 selected soluble factors in serum from the study participants  
514 (Supplemental Table 4).

515

### 516 **Luminex assays**

517 Soluble factors in the serum of the study participants were measured using 4 customized  
518 multiplex panels including 36, 12, 15 and 12 analytes covering a range of human inflammatory  
519 factors (R&D Systems, UK; Supplemental Table 4). Coagulation factors were measured in  
520 plasma using 3 different multiplex panels, including the 6-, 4-, and 3-plex human ProcartaPlex  
521 panels (ThermoFisher). Assays were performed according to the manufacturer's guidelines and  
522 samples were acquired on a Luminex MAGPIX instrument using xPonent 4.0 software  
523 (Luminex).

524

### 525 **Cell preparation and staining for multicolor flow cytometry**

526 For flow cytometric analysis of polymorphonuclear leukocytes, EDTA whole blood samples  
527 from all patients and controls were stained with fluorescently labeled antibodies (Supplemental  
528 Table 7). In brief, plasma fractions were removed by centrifugation and cells were washed with  
529 FACS buffer (PBS, 5% FCS, 0.05 mM EDTA), followed by 15-minute incubation with a  
530 cocktail containing Fc-block (Miltenyi) and fluorescent-labeled antibodies for extracellular  
531 staining. Dead cells were excluded using the fixable LIVE/DEAD Yellow Dead Cell Stain Kit



532 (Life Technologies). Red blood cells (RBC) were lysed with fixation/permeabilization working  
533 solution (BD Cytotfix/Cytoperm™). For SARS-CoV-2 inactivation, samples were fixed for two  
534 additional hours in ultra-pure, methanol-free, 1% formaldehyde (Polyscience). Due to heavy  
535 RBC coagulation in COVID-19 patient samples, an additional RBC lysis for 10 min was  
536 performed. Samples were acquired on a BD FACSymphony equipped with five lasers (BD  
537 Biosciences).

538

### 539 **Flow cytometry data analysis**

540 Standard flow cytometry data analysis was performed using FlowJo version 10. A  
541 compensation matrix for the 25-color flow cytometry panel was generated using AutoSpill  
542 (55), optimized and applied to all fcs files. All data was pre-processed using the time gate.  
543 Following exclusion of doublets and dead cells, neutrophils were defined as  $CD15^+CD193^-$   
544  $CD66b^+CD16^{bright/dim}$ , eosinophils were defined as  $CD15^{bright/dim}CD193^{bright/dim}CD16^-$   
545  $FcER1^{dim}CD123^{dim/-}$  and basophils were defined as  $CD15^-$   
546  $CD193^{bright}FcER1^{bright}CD123^{bright}HLA-DR^{dim/-}$ . In addition, exclusion of potential  
547 contamination by non-granulocytes was done using lineage exclusion markers (CD3, CD14,  
548 CD19, CD56, CD304). Samples containing less than 30 events in the final granulocyte subset  
549 gate were not considered for further phenotypical analysis. The Cytonorm FlowJo plugin v1.0  
550 was applied on each granulocyte population to correct for potential batch effects and was based  
551 on an internal control that was sampled on all sampling occasions. Dimensionality reduction  
552 was performed with the UMAP FlowJo plugin v3.1. Neutrophil populations from each  
553 individual were down-sampled for comparability (FlowJo Downsample plugin v3.3), barcoded  
554 and concatenated. FlowJo Phenograph v3 was used for unsupervised clustering.

555

556 **Statistical analysis**

557 GraphPad Prism version 9 (GraphPad Software) and R v4.0.1 (56) were used to conduct  
558 statistical analyses, where p-values < 0.05 were considered significant. Two-tailed and non-  
559 parametric Mann-Whitney *U* test was used for two-group comparisons. Non-parametric  
560 Kruskal-Wallis test, in combination with two-stage step-up method of Benjamini, Krieger and  
561 Yekutieli for controlling False Discovery rate (FDR), was used for multiple-group  
562 comparisons. Paired samples were analyzed with Wilcoxon matched-pairs signed rank test. For  
563 correlations, the two-tailed non-parametric Spearman test was applied. Where indicated, z-  
564 score of median fluorescence intensity (MFI) was calculated as follows:  $z = (x - \mu) / \sigma$ , being  $x =$   
565 raw score,  $\mu =$  mean of sample distribution and  $\sigma =$  standard deviation. Correlation, hierarchical  
566 clustering and multivariate analysis of flow cytometry data with clinical parameters and  
567 proteomic data was performed and visualized in GraphPad Software and R v4.0.1 and v1.3.959  
568 (56), using the packages factoextra (v1.0.7) (57), FactoMineR (v2.3) (58),  
569 PerformanceAnalytics (v2.0.4) (59), ggplot2 (v3.3.1) (60), gplots (v3.0.4) (61), pheatmap  
570 (v1.0.12) (62), vegan (v2.5-6) (63), corrplot (v0.84) (64), lattice (v0.20-41) (65) and  
571 latticeExtra (v0.6-29) (66), stats (v4.0.1) and complexheatmap (v2.5.6) (67).

572

573 **Multivariable linear regression**

574 Predictive models for clinical outcomes were built based on a data set of 167 immune traits  
575 that included surface marker expression levels, absolute numbers, frequencies of granulocyte  
576 subsets, available clinical information and laboratory measured parameters. The creation of the  
577 models was performed in R v. 3.6.0 (56). Variable redundancy was avoided by identification  
578 of variables with pair-wise spearman correlation coefficient higher than 0.99 (function cor from  
579 package stats), and removal of the variable with the largest mean absolute correlation. The  
580 remaining variables were pair-wise correlated with the clinical outcome, and those with p-

581 values  $< 0.05$  were selected for further evaluation. All possible linear combinations of variables  
582 were evaluated with the function `regsubsets` from the package `leaps` (68) using an ‘exhaustive’  
583 method and evaluating 3 subsets per model size. The models with highest adjusted  $R^2$ , lowest  
584 bayesian information criterion and a Mallows’  $C_p$  lower and closer to the number of  
585 coefficients, were selected for further evaluation. The variance inflation factor for each model  
586 was calculated to avoid redundancy in the independent variables with the function `var` from  
587 package `car` (69). The selected final model had no redundant variables, and all must be  
588 significant ( $p\text{-value} < 0.05$ ). The contribution of each parameter to each model was calculated  
589 with the functions `cal.relimp` from package `relaimpo` (70) with the `lgm` metric. Differences in  
590 the model after addition of factors for correction (sex, age, BMI, smoking, days from symptom  
591 to sampling and from admission to sampling and co-morbidities) were evaluated by computing  
592 an analysis of variance for the two linear models.  
593

594 **Author contributions**

595 Conceptualization: ML, MD, LH, AP, ANT, BJC. Methodology: ML, MD, LH, LMPM.  
596 Investigation: ML, MD, LH, LMPM, PC, JRM, J-BG, JE, KMo, MG, KMa. Data analysis: ML,  
597 MD, LH, HB, LMPM, EK, MC, AP. Patient recruitment and clinical information: EF, SGR,  
598 AS, LIE, OR, SA, KS, H-GL, NKB. Organization of sample handling and other resources: PC,  
599 JK, JM<sub>i</sub>, MFT, SB, MB, JM<sub>j</sub>, K-JM, JS, J-IH and the Karolinska KI/K COVID-19 Study Group.  
600 Writing (original draft): ML, MD, LH, HB, LMPM, AP, BJC, ANT. Writing (review and  
601 editing): All authors. Supervision of experiments: ML.

602

603 **Acknowledgements**

604 We thank all patients and healthy donors for their generous participation.

605 See Supplemental Acknowledgments for Karolinska KI/K COVID-19 consortium details. The  
606 study was supported by grants from Nordstjernan AB and Knut and Alice Wallenberg  
607 Foundation to H-GL, the Swedish Governmental Agency for Innovation Systems (VINNOVA)  
608 under the frame of NordForsk (Project no. 90456, PerAID) and the Swedish Research Council  
609 under the frame of ERA PerMed (Project 2018-151, PerMIT) to ANT, the Swedish Research  
610 Council to BJC and AP, the Swedish Cancer Foundation to BJC, Clas Groschinsky Foundation,  
611 Centrum for Innovative Medicine to AP and ANT, the Swedish Children's Cancer Foundation  
612 (TJ2018-0128 and PR2019-0100) to ML, Åke Olsson Foundation to ML and AP and KI  
613 Research Foundation to ML, LH and AP.

614

615 **Data and material availability**

616 Curated flow cytometry data will be made available for exploration via the KI/K COVID-19  
617 Immune Atlas, <http://covid19cellatlas.com/>. All other data needed to evaluate the conclusions  
618 of the paper are presented in the paper or in the Supplemental Material.

619 **References**

- 620 1. Guan WJ, et al. Clinical Characteristics of Coronavirus Disease 2019 in China. *N Engl*  
621 *J Med.* 2020;382(18):1708-1720.
- 622 2. Wu Z, and McGoogan JM. Characteristics of and Important Lessons From the  
623 Coronavirus Disease 2019 (COVID-19) Outbreak in China: Summary of a Report of  
624 72314 Cases From the Chinese Center for Disease Control and Prevention. *JAMA.* 2020.
- 625 3. Mehta P, et al. COVID-19: consider cytokine storm syndromes and  
626 immunosuppression. *Lancet.* 2020;395(10229):1033-1034.
- 627 4. Yang Y, et al. Plasma IP-10 and MCP-3 levels are highly associated with disease  
628 severity and predict the progression of COVID-19. *J Allergy Clin Immunol.*  
629 2020;146(1):119-127 e114.
- 630 5. Blanco-Melo D, et al. Imbalanced Host Response to SARS-CoV-2 Drives Development  
631 of COVID-19. *Cell.* 2020;181(5):1036-1045 e1039.
- 632 6. Lucas C, et al. Longitudinal analyses reveal immunological misfiring in severe COVID-  
633 19. *Nature.* 2020.
- 634 7. Mantovani A, et al. Neutrophils in the activation and regulation of innate and adaptive  
635 immunity. *Nat Rev Immunol.* 2011;11(8):519-531.
- 636 8. Liu J, et al. Longitudinal characteristics of lymphocyte responses and cytokine profiles  
637 in the peripheral blood of SARS-CoV-2 infected patients. *EBioMedicine.*  
638 2020;55:102763.
- 639 9. Channappanavar R, et al. Sex-Based Differences in Susceptibility to Severe Acute  
640 Respiratory Syndrome Coronavirus Infection. *J Immunol.* 2017;198(10):4046-4053.
- 641 10. Alfaraj SH, et al. Clinical predictors of mortality of Middle East Respiratory Syndrome  
642 Coronavirus (MERS-CoV) infection: A cohort study. *Travel Med Infect Dis.*  
643 2019;29:48-50.

- 644 11. Lee JJ, et al. Human versus mouse eosinophils: "that which we call an eosinophil, by  
645 any other name would stain as red". *J Allergy Clin Immunol.* 2012;130(3):572-584.
- 646 12. Camp JV, and Jonsson CB. A Role for Neutrophils in Viral Respiratory Disease. *Front*  
647 *Immunol.* 2017;8:550.
- 648 13. Miura TA, and Holmes KV. Host-pathogen interactions during coronavirus infection of  
649 primary alveolar epithelial cells. *J Leukoc Biol.* 2009;86(5):1145-1151.
- 650 14. Karasuyama H, et al. Multifaceted roles of basophils in health and disease. *J Allergy*  
651 *Clin Immunol.* 2018;142(2):370-380.
- 652 15. Rosenberg HF, et al. Eosinophils and their interactions with respiratory virus pathogens.  
653 *Immunol Res.* 2009;43(1-3):128-137.
- 654 16. Liao M, et al. Single-cell landscape of bronchoalveolar immune cells in patients with  
655 COVID-19. *Nat Med.* 2020;26(6):842-844.
- 656 17. Chua RL, et al. COVID-19 severity correlates with airway epithelium-immune cell  
657 interactions identified by single-cell analysis. *Nat Biotechnol.* 2020.
- 658 18. Wilk AJ, et al. A single-cell atlas of the peripheral immune response in patients with  
659 severe COVID-19. *Nat Med.* 2020.
- 660 19. Schulte-Schrepping J, et al. Severe COVID-19 Is Marked by a Dysregulated Myeloid  
661 Cell Compartment. *Cell.* 2020;182(6):1419-1440 e1423.
- 662 20. Agrati C, et al. Expansion of myeloid-derived suppressor cells in patients with severe  
663 coronavirus disease (COVID-19). *Cell Death Differ.* 2020.
- 664 21. Hadjadj J, et al. Impaired type I interferon activity and inflammatory responses in severe  
665 COVID-19 patients. *Science.* 2020.
- 666 22. Silvestre-Roig C, et al. Neutrophil Diversity in Health and Disease. *Trends Immunol.*  
667 2019;40(7):565-583.

- 668 23. Jaillon S, et al. Neutrophil diversity and plasticity in tumour progression and therapy.  
669 *Nat Rev Cancer*. 2020.
- 670 24. Rodriguez L, et al. Systems-Level Immunomonitoring from Acute to Recovery Phase  
671 of Severe COVID-19. *Cell Rep Med*. 2020;1(5):100078.
- 672 25. Sekine T, et al. Robust T Cell Immunity in Convalescent Individuals with  
673 Asymptomatic or Mild COVID-19. *Cell*. 2020;183(1):158-168 e114.
- 674 26. Maucourant C, et al. Natural killer cell immunotypes related to COVID-19 disease  
675 severity. *Sci Immunol*. 2020;5(50).
- 676 27. Parrot T, et al. MAIT cell activation and dynamics associated with COVID-19 disease  
677 severity. *Sci Immunol*. 2020;5(51).
- 678 28. García M, et al. Innate lymphoid cell composition associates with COVID-19 disease  
679 severity. *Clinical & Translational Immunology*. 2020;9(12):e1224.
- 680 29. Liu J, et al. Neutrophil-to-lymphocyte ratio predicts critical illness patients with 2019  
681 coronavirus disease in the early stage. *J Transl Med*. 2020;18(1):206.
- 682 30. Ng LG, et al. Heterogeneity of neutrophils. *Nat Rev Immunol*. 2019;19(4):255-265.
- 683 31. Kwok I, et al. Combinatorial Single-Cell Analyses of Granulocyte-Monocyte  
684 Progenitor Heterogeneity Reveals an Early Uni-potent Neutrophil Progenitor.  
685 *Immunity*. 2020.
- 686 32. Yoon J, et al. CD66b regulates adhesion and activation of human eosinophils. *J*  
687 *Immunol*. 2007;179(12):8454-8462.
- 688 33. Yi S, et al. Eosinophil recruitment is dynamically regulated by interplay among lung  
689 dendritic cell subsets after allergen challenge. *Nat Commun*. 2018;9(1):3879.
- 690 34. Manz MG, and Boettcher S. Emergency granulopoiesis. *Nat Rev Immunol*.  
691 2014;14(5):302-314.

- 692 35. Guo PL, et al. The clinical significance of myeloid-derived suppressor cells in dengue  
693 fever patients. *BMC Infect Dis.* 2019;19(1):926.
- 694 36. Silvin A, et al. Elevated Calprotectin and Abnormal Myeloid Cell Subsets Discriminate  
695 Severe from Mild COVID-19. *Cell.* 2020;182(6):1401-1418 e1418.
- 696 37. Bowers NL, et al. Immune suppression by neutrophils in HIV-1 infection: role of PD-  
697 L1/PD-1 pathway. *PLoS Pathog.* 2014;10(3):e1003993.
- 698 38. Carissimo G, et al. Whole blood immunophenotyping uncovers immature neutrophil-  
699 to-VD2 T-cell ratio as an early marker for severe COVID-19. *Nat Commun.*  
700 2020;11(1):5243.
- 701 39. Jablonska J, et al. Neutrophils responsive to endogenous IFN-beta regulate tumor  
702 angiogenesis and growth in a mouse tumor model. *J Clin Invest.* 2010;120(4):1151-  
703 1164.
- 704 40. Mistry P, et al. Transcriptomic, epigenetic, and functional analyses implicate neutrophil  
705 diversity in the pathogenesis of systemic lupus erythematosus. *Proc Natl Acad Sci U S*  
706 *A.* 2019;116(50):25222-25228.
- 707 41. Xie X, et al. Single-cell transcriptome profiling reveals neutrophil heterogeneity in  
708 homeostasis and infection. *Nat Immunol.* 2020.
- 709 42. Tang BM, et al. Neutrophils-related host factors associated with severe disease and  
710 fatality in patients with influenza infection. *Nat Commun.* 2019;10(1):3422.
- 711 43. Rimmelzwaan GF, et al. Inhibition of influenza virus replication by nitric oxide. *J Virol.*  
712 1999;73(10):8880-8883.
- 713 44. Mesnil C, et al. Lung-resident eosinophils represent a distinct regulatory eosinophil  
714 subset. *J Clin Invest.* 2016;126(9):3279-3295.
- 715 45. Flores-Torres AS, et al. Eosinophils and Respiratory Viruses. *Viral Immunol.*  
716 2019;32(5):198-207.



- 717 46. Drake MG, et al. Human and Mouse Eosinophils Have Antiviral Activity against  
718 Parainfluenza Virus. *Am J Respir Cell Mol Biol*. 2016;55(3):387-394.
- 719 47. Lindsley AW, et al. Eosinophil responses during COVID-19 infections and coronavirus  
720 vaccination. *J Allergy Clin Immunol*. 2020;146(1):1-7.
- 721 48. Jiang AP, et al. Human Blood-Circulating Basophils Capture HIV-1 and Mediate Viral  
722 trans-Infection of CD4+ T Cells. *J Virol*. 2015;89(15):8050-8062.
- 723 49. Rossi FW, et al. HIV-1 Nef promotes migration and chemokine synthesis of human  
724 basophils and mast cells through the interaction with CXCR4. *Clin Mol Allergy*.  
725 2016;14:15.
- 726 50. Kalm F, et al. Adhesion molecule cross-linking and cytokine exposure modulate IgE-  
727 and non-IgE-dependent basophil activation. *Immunology*. 2021;162(1):92-104.
- 728 51. Rosenberg HF, et al. Eosinophils: changing perspectives in health and disease. *Nat Rev*  
729 *Immunol*. 2013;13(1):9-22.
- 730 52. Li Q, et al. Eosinopenia and elevated C-reactive protein facilitate triage of COVID-19  
731 patients in fever clinic: A retrospective case-control study. *EClinicalMedicine*.  
732 2020;23:100375.
- 733 53. Laing AG, et al. A dynamic COVID-19 immune signature includes associations with  
734 poor prognosis. *Nat Med*. 2020;26(10):1623-1635.
- 735 54. Vabret N, et al. Immunology of COVID-19: Current State of the Science. *Immunity*.  
736 2020;52(6):910-941.
- 737 55. Roca CP, et al. AutoSpill: a method for calculating spillover coefficients in high-  
738 parameter flow cytometry. *bioRxiv*. 2020:2020.2006.2029.177196.
- 739 56. Team RC. R: A language and environment for statistical computing. 2019.
- 740 57. Kassambara A, and Mundt F. factoextra: Extract and Visualize the Results of  
741 Multivariate Data Analyses. 2020.

- 742 58. Lê S, et al. FactoMineR: An R Package for Multivariate Analysis. *Journal of Statistical*  
743 *Software*. 2008;25(1):1-18.
- 744 59. Peterson BG, et al. PerformanceAnalytics: Econometric Tools for Performance and  
745 Risk Analysis. 2020.
- 746 60. Wickham H. *ggplot2: Elegant Graphics for Data Analysis*. Springer International  
747 Publishing; 2016.
- 748 61. Warnes GR, et al. *gplots: Various R Programming Tools for Plotting Data*. 2020.
- 749 62. Kolde R. *pheatmap: Pretty Heatmaps*. 2019.
- 750 63. Oksanen J, et al. *vegan: Community Ecology Package*. 2020.
- 751 64. Wei T, et al. *corrplot: Visualization of a Correlation Matrix*. 2017.
- 752 65. Sarkar D. *Lattice: Multivariate Data Visualization with R. Use R!* 2008.
- 753 66. Sarkar D, and Andrews F. *latticeExtra: Extra Graphical Utilities Based on Lattice*. 2019.
- 754 67. Gu Z, et al. Complex heatmaps reveal patterns and correlations in multidimensional  
755 genomic data. *Bioinformatics*. 2016;32(18):2847-2849.
- 756 68. Lumley T. *leaps: Regression Subset Selection*. Based on Fortran code by Alan Miller.  
757 2020.
- 758 69. Fox J, et al. *car: Companion to Applied Regression*. 2020.
- 759 70. Groemping U, and Matthias L. *relaimpo: Relative Importance of Regressors in Linear*  
760 *Models*. 2018.
- 761

## Figures and figure legends

Figure 1

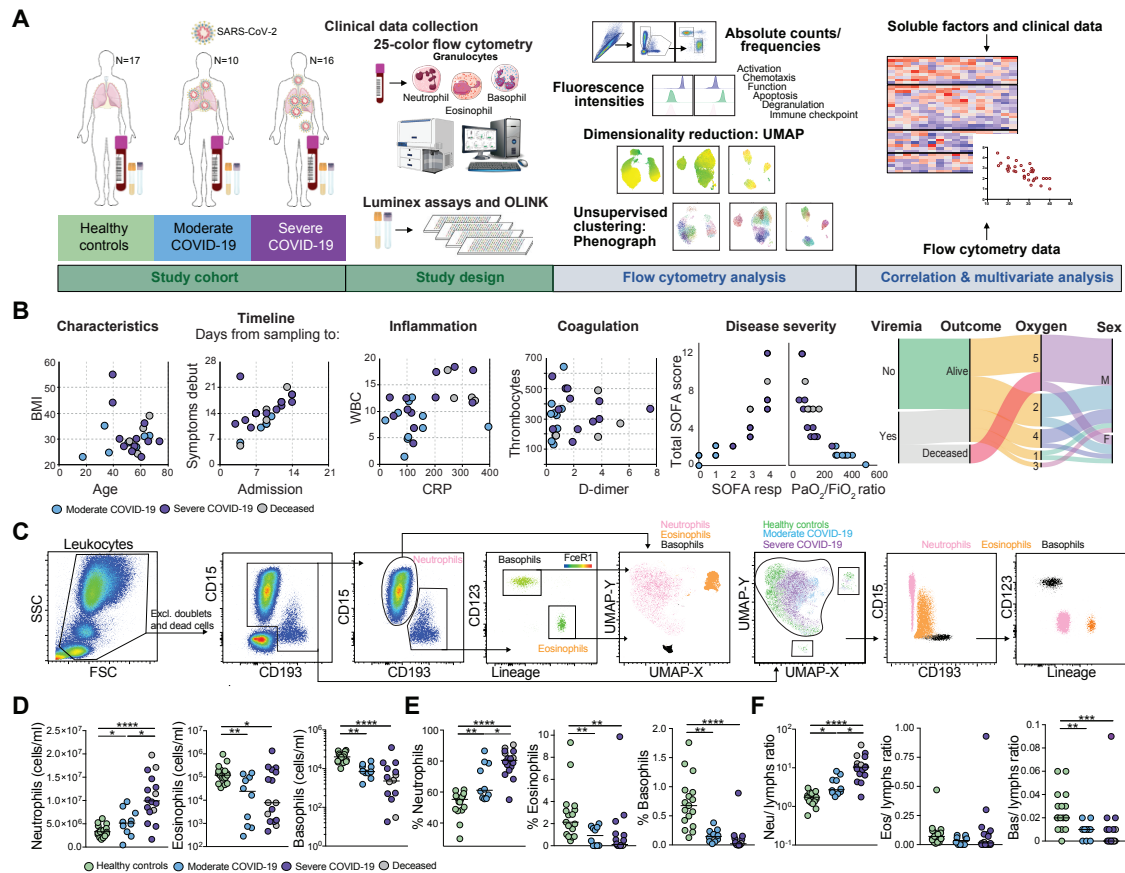

**Figure 1. Disease severity-dependent neutrophilia and marked decrease of eosinophils and basophils in COVID-19.** (A) Experimental and analytical workflow of the study performed on samples from moderate and severe COVID-19 patients and age-matched healthy controls. (B) Dot plots (left) and alluvial diagram (right) describing demographics and the clinical characteristics of the patients included in the study cohort. Severity groups (moderate=blue; severe=purple; deceased=gray) are indicated. (C) Gating strategy for the identification of granulocyte subsets and their UMAP projection is shown on the left. On the right, analogue results are obtained through unsupervised subset identification based on UMAP projection of total granulocytes. (D-E) Absolute cell counts (D) and frequencies (E) among total leukocytes for neutrophils, eosinophils and basophils in healthy controls (n=17), moderate COVID-19 patients (n=10) and severe COVID-19 patients (n=16). (F) Ratios of granulocyte absolute counts over lymphocyte absolute counts in healthy controls (n=17), moderate COVID-19 patients (n=10) and severe COVID-19 patients (n=16). In (D-F), Kruskal-Wallis test and two-stage Benjamini, Krieger and Yekutieli test. Bars represent median. \*  $p < 0.05$ ; \*\*  $p < 0.01$ ; \*\*\*  $p < 0.001$ ; \*\*\*\*  $p < 0.0001$ . Neu, neutrophils; eos, eosinophils; bas, basophils; lymphs, lymphocytes.

Figure 2

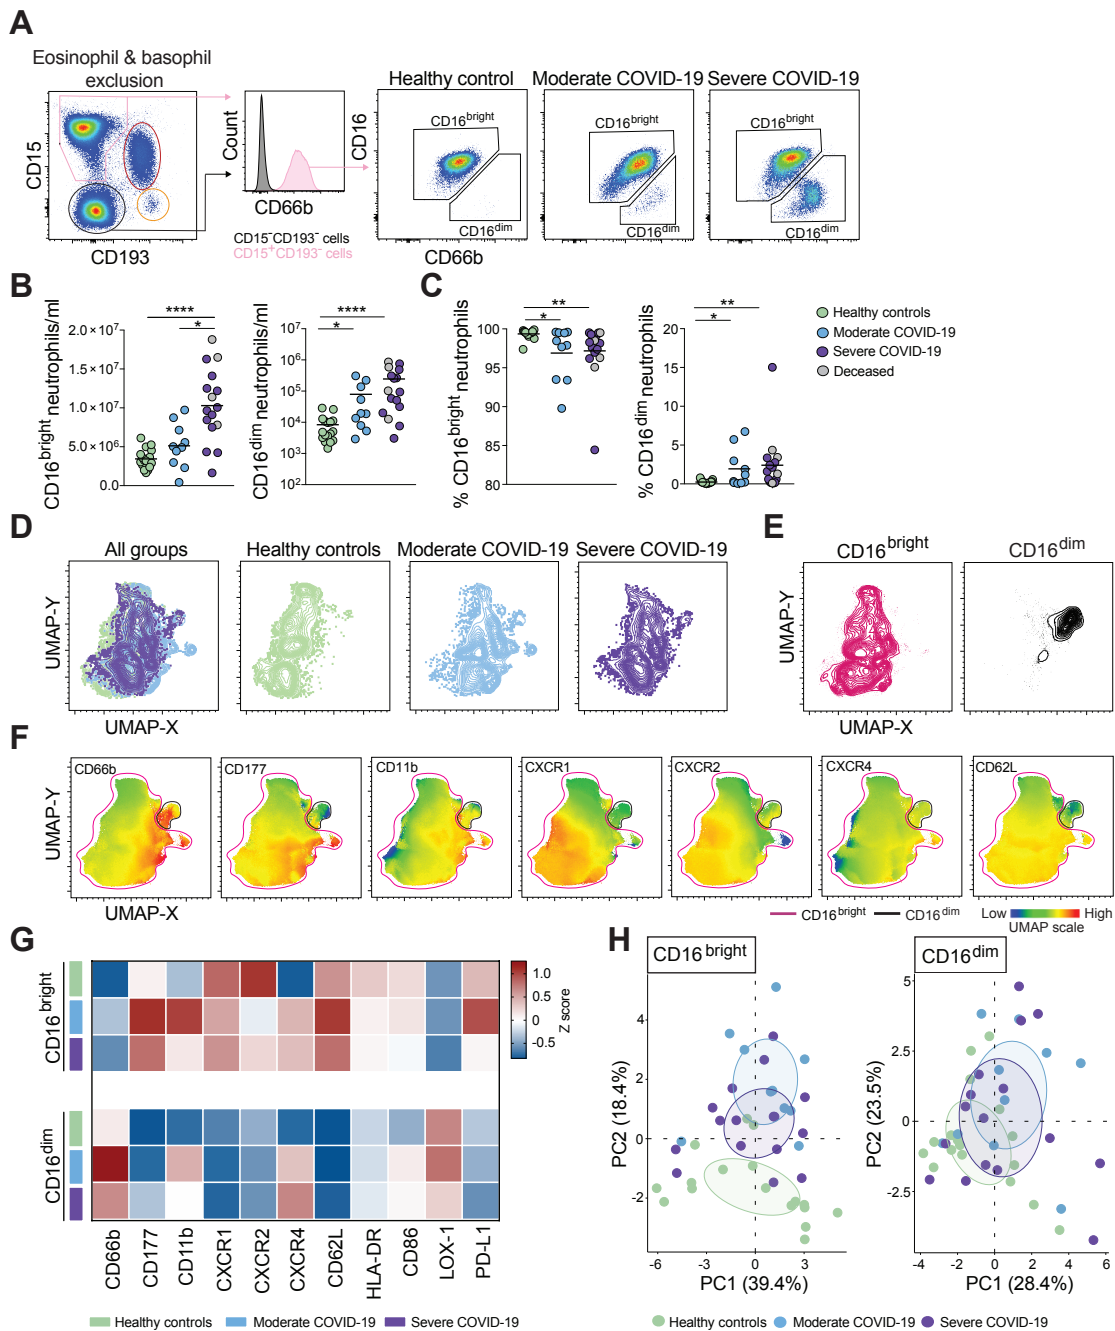

**Figure 2. Emergence of immature neutrophils in severe COVID-19.** (A) Representative plots showing neutrophil identification and CD16<sup>bright</sup> and CD16<sup>dim</sup> subset discrimination in different study groups. Absolute cell counts (B) and frequencies (C) among total neutrophils of CD16<sup>bright</sup> and CD16<sup>dim</sup> cells in healthy controls (n=17), moderate COVID-19 patients (n=10) and severe COVID-19 patients (n=16). (D) UMAPs on concatenated files (see Methods) of total neutrophils in healthy controls, moderate and severe COVID-19 patients. (E) UMAPs of CD16<sup>bright</sup> and CD16<sup>dim</sup> cells within pooled neutrophils from all study groups (30,000 down-sampled cells/individual). (F) Median fluorescence intensity (MFI) of selected surface markers in the UMAP projection described in (D). (G) Heatmap showing the mean normalized marker expression (z-score) in CD16<sup>bright</sup> and CD16<sup>dim</sup> neutrophils in healthy

controls (n=17), moderate (n=10) and severe COVID-19 patients (n=16). **(H)** PCA based on marker expression (MFI) on CD16<sup>bright</sup> and CD16<sup>dim</sup> neutrophils. **(B)** and **(C)** Kruskal-Wallis test and two-stage Benjamini, Krieger and Yekutieli test. Bars represent median. \*  $p < 0.05$ ; \*\*  $p < 0.01$ ; \*\*\*\*  $p < 0.0001$ .

Figure 3

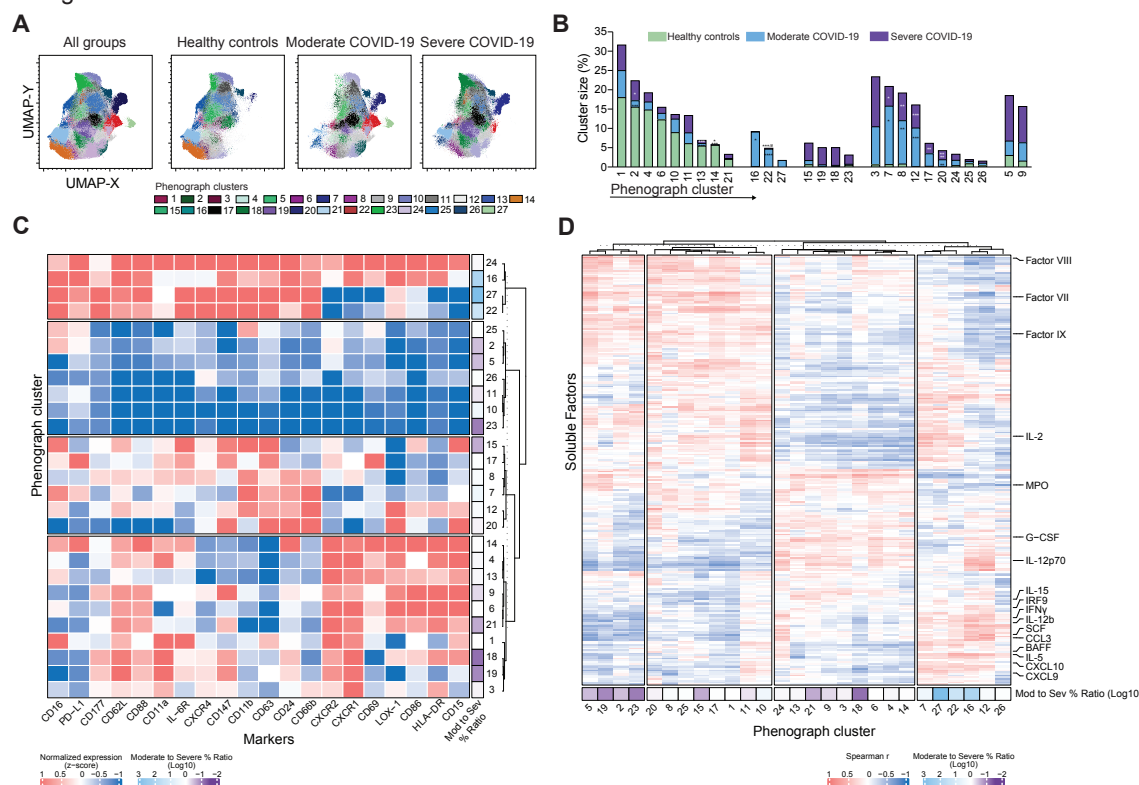

**Figure 3. Phenograph analysis identifies activated neutrophil subsets correlating with markers of anti-viral immune response in moderate COVID-19 patients.** (A) Distribution of the 27 identified phenograph clusters overlaid on the UMAP projection. (B) Frequency of the phenograph clusters within healthy controls (n=17), moderate (n=10) and severe COVID-19 patients (n=16). \*, statistically significant differences in comparisons with healthy controls. #, statistically significant differences comparing moderate and severe patients. (C) Heatmap showing normalized expression (MFI z-score) of 20 markers analyzed by flow cytometry in the 27 neutrophil clusters identified in (A). Hierarchical clustering was performed and rows were split by  $k$ -means=4. Right annotation shows the log<sub>10</sub>-ratio of cluster enrichment in moderate (blue) versus severe (purple) COVID-19 patients. (D) Heatmap showing Spearman correlation between phenograph clusters and soluble factors detected in all COVID-19 patients (n=26). Hierarchical clustering was performed, and columns were split by  $k$ -means=4. Bottom annotation shows the log<sub>10</sub>-ratio of cluster enrichment in moderate (blue) versus severe (purple) COVID-19 patients. In (B) Kruskal-Wallis test and two-stage Benjamini, Krieger and Yekutieli test. \*  $p < 0.05$ ; \*\*  $p < 0.01$ ; \*\*\*  $p < 0.0001$ .

Figure 4

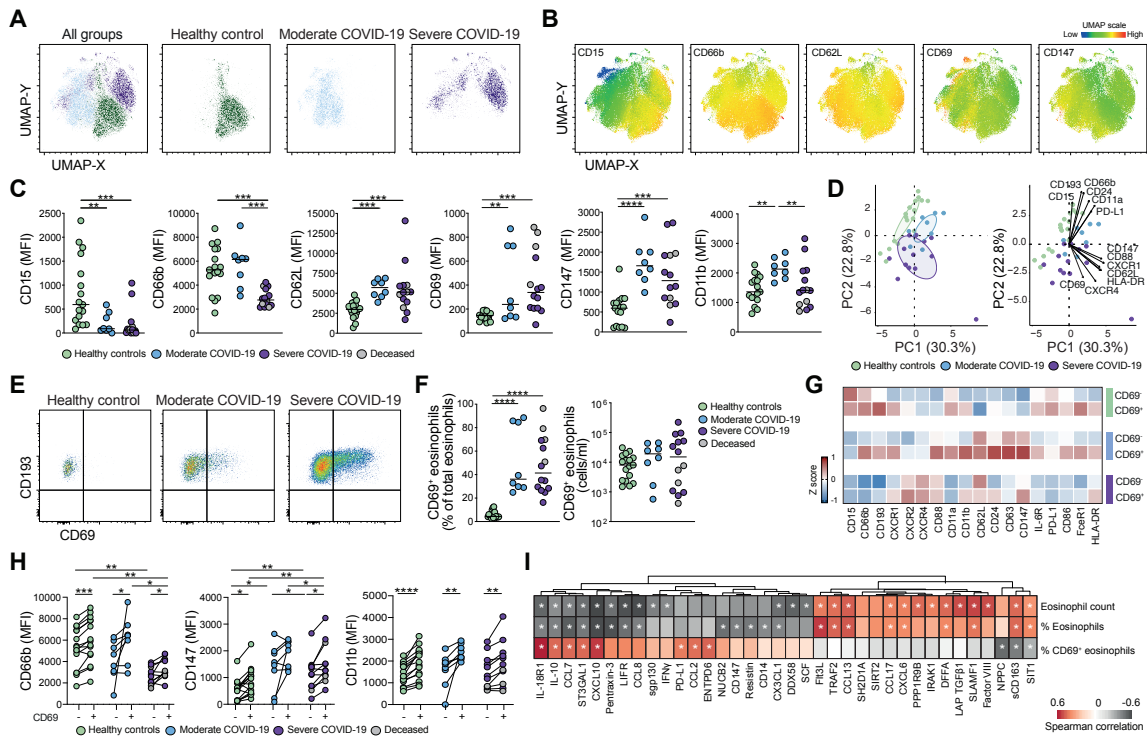

**Figure 4: Activation of eosinophils in patients with COVID-19.** (A) Overall and individual UMAPs on concatenated files (see Methods) of eosinophils in healthy controls, moderate and severe COVID-19 patients. (B) UMAP displaying the MFI of selected markers. (C) MFI of selected eosinophil markers in healthy controls (n=17), patients with moderate (n=8) and severe (n=14) COVID-19. Median values for each group are indicated. (D) PCA based on MFI expression of eosinophil markers. (E) CD69<sup>+</sup> eosinophils from a representative healthy control and COVID-19 patients. (F) Frequencies and absolute counts of CD69<sup>+</sup> eosinophils in healthy controls (n=17), moderate (n=8) and severe (n=14) COVID-19 patients. (G) Marker expression (z-score) on CD69<sup>-</sup> and CD69<sup>+</sup> subsets. (H) MFI of selected markers in eosinophil subsets in healthy controls (n=15), in moderate (n=8) and severe (n=11) COVID-19 patients. (I) Heatmaps demonstrating correlations (Spearman non-parametric,  $r < -0.4$  or  $r > 0.4$ ,  $p < 0.05$ ) between absolute eosinophil counts, frequencies and percent of CD69<sup>+</sup> eosinophils and soluble factors in COVID-19 patients. Statistical analysis by Kruskal-Wallis test and two-stage Benjamini, Krieger and Yekutieli test (C, F and H) and Wilcoxon matched-pairs signed rank test (H). FDR adjusted p-values are indicated. \*  $p < 0.05$ ; \*\*  $p < 0.01$ ; \*\*\*  $p < 0.001$ ; \*\*\*\*  $p < 0.0001$ .



Figure 5

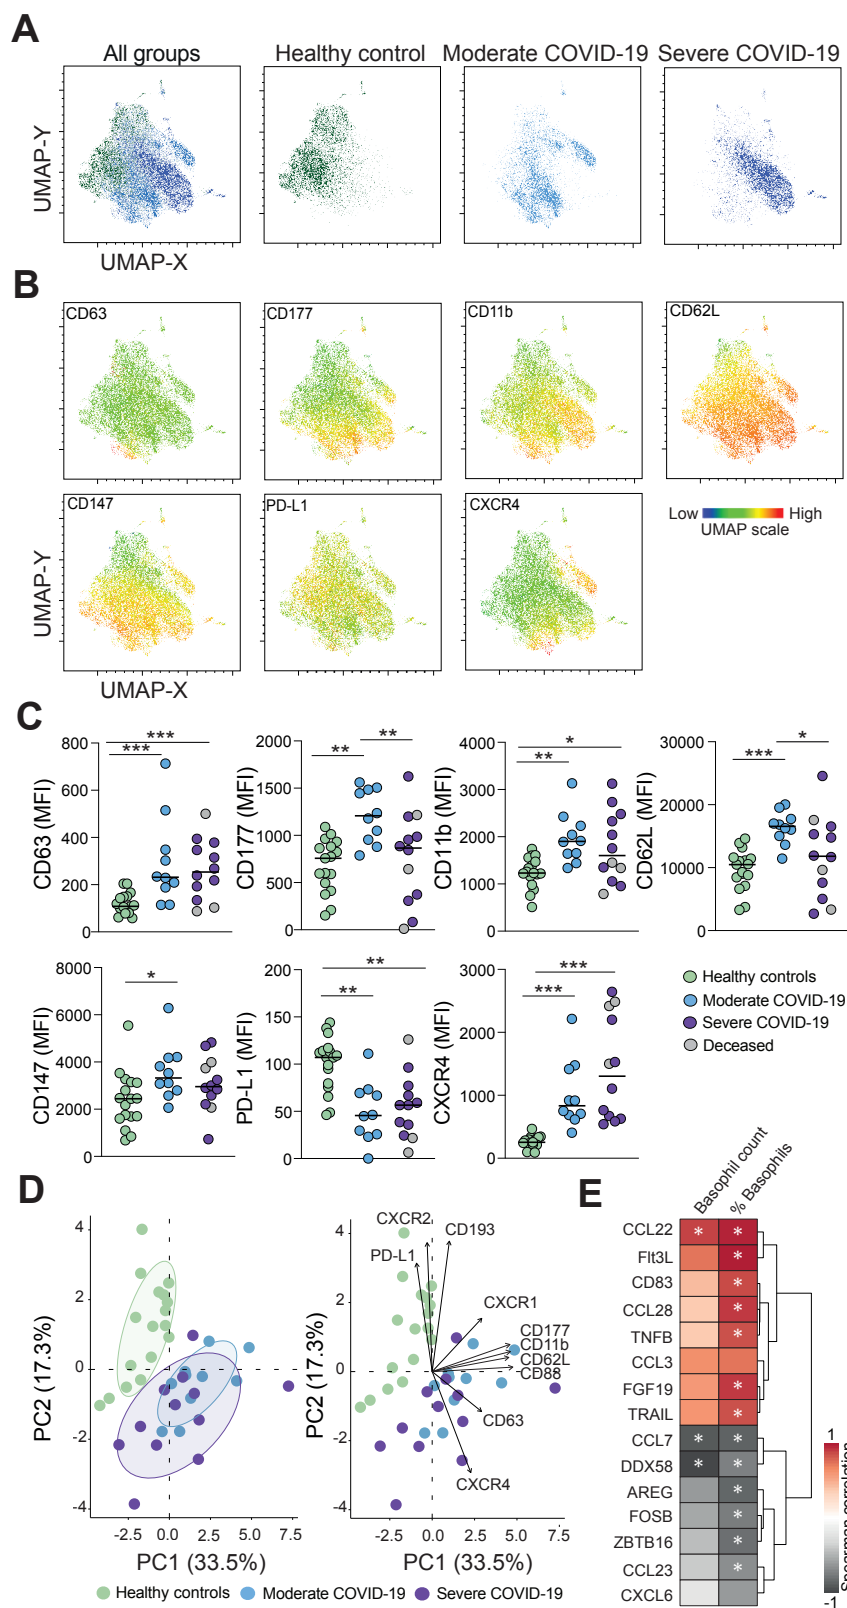

**Figure 5. Basophils in COVID-19 patients display an activated phenotype.** (A) UMAPs on concatenated files (see Methods) showing basophil overview together with representative plots



heathy controls, moderate and severe COVID-19 patients. **(B)** UMAP showing the level of expression of selected markers on basophils. **(C)** MFI for selected markers on basophils in heathy controls (n=17), moderate (n=10) and severe (n=12) COVID-19 patients. Median values for each group are indicated. **(D)** PCA and biplot based on the MFI expression of representative basophil markers in healthy controls, moderate and severe COVID-19 patients. **(E)** Heatmap demonstrating correlation (Spearman non-parametric,  $r < -0.4$  or  $r > 0.4$ ,  $p < 0.05$ ) between absolute basophil counts/basophil frequencies of total leukocytes and basophil-associated soluble factors, in COVID-19 patients. Significant differences between healthy controls and patient groups in **(C)** were evaluated with Kruskal-Wallis test and two-stage Benjamini, Krieger and Yekutieli test. FDR adjusted p-values are indicated. \*  $p < 0.05$ ; \*\*  $p < 0.01$ ; \*\*\*  $p < 0.001$ .

Figure 6

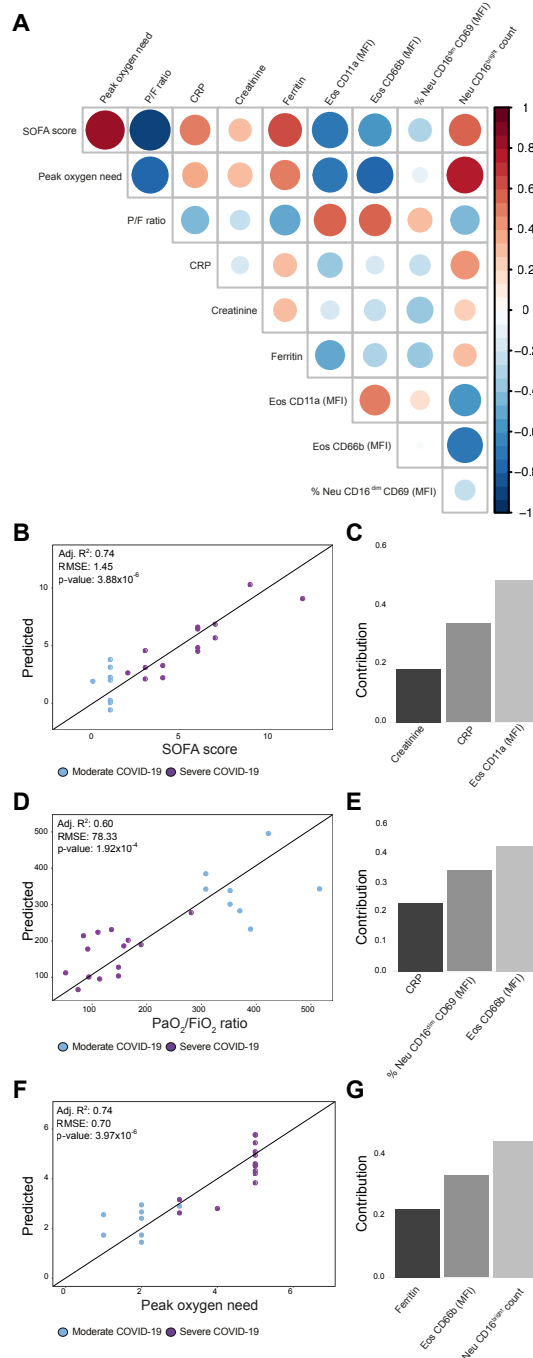

**Figure 6. Eosinophil activation and neutrophil maturation are relevant for prediction of SOFA score and respiratory function.** (A) Diagonal correlation matrix including predicted clinical outcomes (bold) and the explanatory variables included in the final models. (B-G) Multivariate linear regressions for prediction of SOFA score (B-C), PaO<sub>2</sub>/FiO<sub>2</sub> (P/F) ratio (D-E) and peak oxygen need (F-G) were modeled based on immune traits and laboratory markers. (B, D, F) Scatter plots of actual values versus predicted values of the linear models. (C, E, G) Individual contribution of the variables included in the final models. Adj R<sup>2</sup>, Adjusted R<sup>2</sup>; RMSE, Root-mean-square error; Eos, Eosinophils; Neu, Neutrophils.

Figure 7

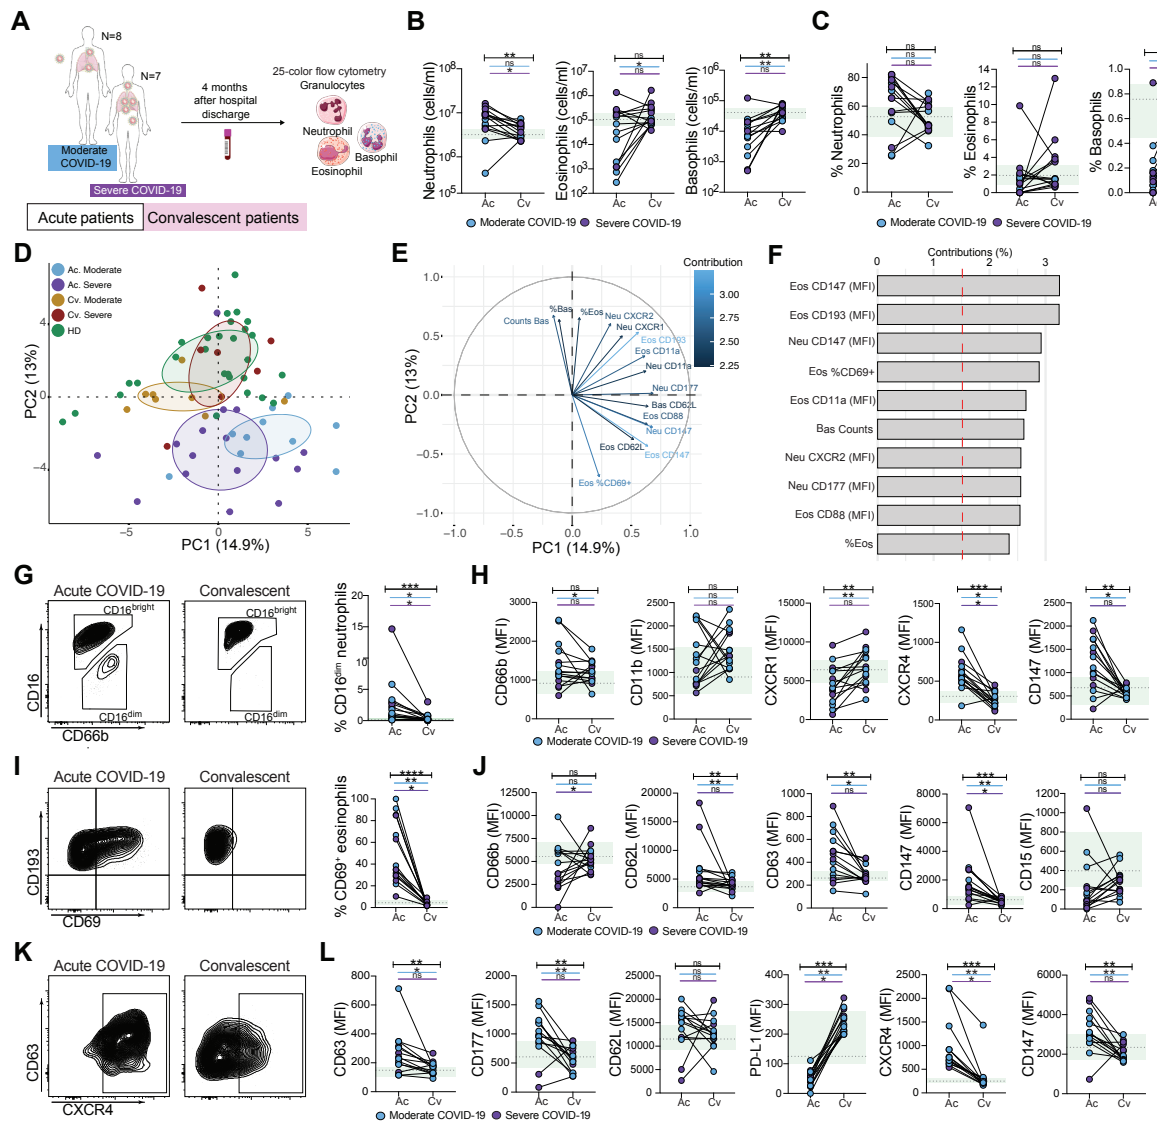

**Figure 7. Granulocyte phenotype in convalescent patients is largely restored.** (A) Schematic illustration of paired acute (Ac) and convalescent (Cv) patient samples included in the study. Absolute cell counts (B) and granulocyte frequencies over total leukocytes (C) in paired Ac and Cv patients (n=15). (D) PCA based on cell counts, frequencies and normalized MFI (z-score) of all measured markers. (E) Variable correlation plot. (F) Relative contribution of variables to PC1 and PC2. (G) CD16<sup>dim</sup> neutrophil frequencies in paired Ac and Cv patient samples (n=15). (H) Expression of selected neutrophil markers in paired Ac and Cv patients (n=15). (I) CD69<sup>+</sup> eosinophil expression in paired Ac and Cv patients (n=15). (J) Expression of selected eosinophil markers in paired Ac and Cv patient samples (n=15). (K) CXCR4 basophil expression in Ac and Cv patients. (L) Expression of selected basophil markers in paired Ac and Cv patients (n=15). Wilcoxon matched-pairs rank test; ns, not significant; \* p < 0.05; \*\* p < 0.01; \*\*\* p < 0.001; \*\*\*\* p < 0.0001. Healthy controls (n=28, median±IQR) ranges are shown in green. Bars indicate statistical significance considering all sampled patients (black), only moderate (blue) or only severe (purple) patients. Bas, Basophils; Eos, Eosinophils; Neu, Neutrophils.
